# Supplementary material for: Impact of Coated Zinc Oxide Nanoparticles on Photosystem II of Tomato Plants
Source: MDPI journal article supplement (doi:10.3390/ma16175846), 2023-08-26
Supplement: s1 [file s1]

# Impact of Coated Zinc Oxide Nanoparticles on Photosystem II of Tomato Plants

Panagiota Tryfon <sup>1</sup>, Ilektra Sperdouli <sup>2</sup>, Ioannis-Dimosthenis S. Adamakis <sup>3</sup>, Stefanos Mourdikoudis <sup>4,5</sup>, Michael Moustakas <sup>6,\*</sup>, and Catherine Dendrinou-Samara <sup>1,\*</sup>

**Table S1.** Definitions of the chlorophyll fluorescence parameters used in the experiments.

| Parameter     | Definition                                                                                                                                          | Calculation                                                                                                                                                                    |
|---------------|-----------------------------------------------------------------------------------------------------------------------------------------------------|--------------------------------------------------------------------------------------------------------------------------------------------------------------------------------|
| $F_v/F_m$     | Maximum efficiency of PSII photochemistry                                                                                                           | $(F_m - F_o)/F_m$                                                                                                                                                              |
| $\Phi_{PSII}$ | Effective quantum yield of PSII photochemistry                                                                                                      | $(F_m' - F_s)/F_m'$                                                                                                                                                            |
| $\Phi_{NPQ}$  | Quantum yield of regulated non-photochemical energy loss in PSII                                                                                    | $F_s/F_m' - F_s/F_m$                                                                                                                                                           |
| $\Phi_{NO}$   | Quantum yield of nonregulated energy loss in PSII                                                                                                   | $F_s/F_m$                                                                                                                                                                      |
| $F_v'/F_m'$   | Efficiency of open PSII centers                                                                                                                     | $(F_m' - F_o')/F_m'$                                                                                                                                                           |
| $F_v/F_o$     | Efficiency of the oxygen evolving complex (OEC) on the donor side of PSII                                                                           | $(F_m - F_o)/F_o$                                                                                                                                                              |
| ETR           | Electron transport rate                                                                                                                             | $\Phi_{PSII} \times PAR \times c \times abs$ , where PAR is the photosynthetically active radiation, c is 0.5, and abs is the total light absorption of the leaf taken as 0.84 |
| qp            | Photochemical quenching, representing the redox state of quinone A ( $Q_A$ ), or in other words the fraction of PSII reaction centers in open state | $(F_m' - F_s)/(F_m' - F_o')$                                                                                                                                                   |
| NPQ           | Non-photochemical quenching reflecting the dissipation of excitation energy as heat                                                                 | $(F_m - F_m')/F_m'$                                                                                                                                                            |
| EXC           | Excess excitation energy                                                                                                                            | $(1 - qp) \times F_v'/F_m'$                                                                                                                                                    |

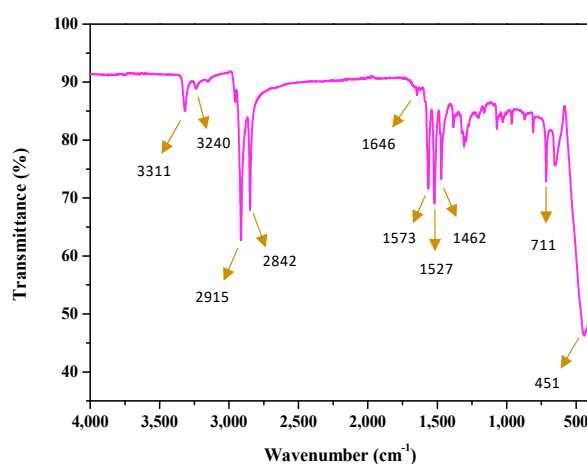

**Figure S1.** Fourier transform infrared spectroscopy (FT-IR) spectra of the ZnO@OAm NPs.

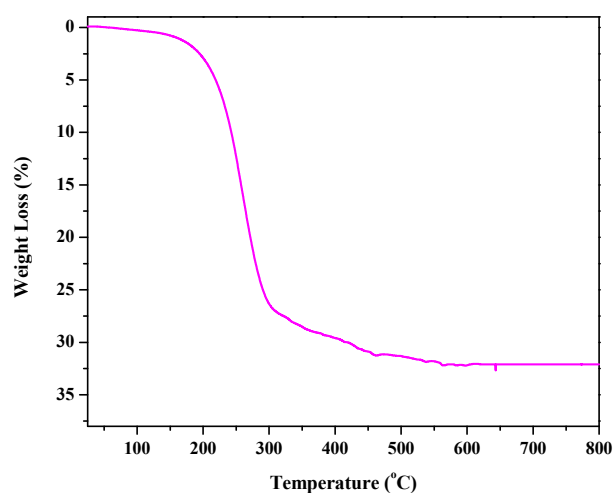

**Figure S2.** Thermogravimetric analysis curve of ZnO@OAm NPs with the main steps of organic coating weight loss.

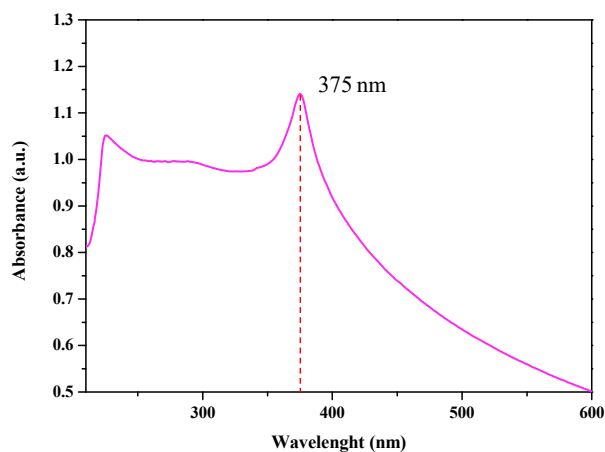

**Figure S3.** UV-Vis absorption spectrum of the ZnO@OAm NPs after preparation of NPs in a water-ethanol media.

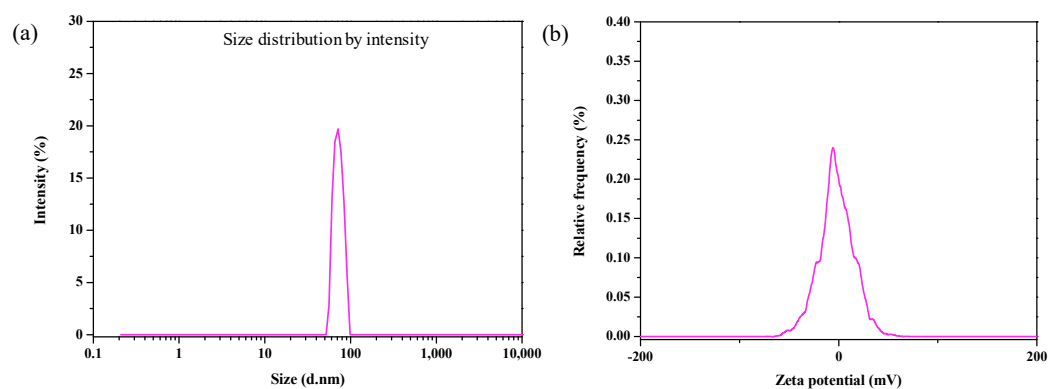

**Figure S4.** Size distribution (a) and  $\zeta$ -potential (b) of the solvothermally prepared ZnO@OAm NPs.
